# Supplementary material for: Identification of a potential allosteric site of Golgi α-mannosidase II using computer-aided drug design
Source: PubMed Central journal article supplement (PMC6505943; doi:10.1371/journal.pone.0216132), 2019-05-08
Supplement: pone.0216132.s001.pdf [file pone.0216132.s001.pdf]

| Compound       | Molecular structure                                                                 | Score<br>[kJ/mol] | Predicted<br>LE*<br>[kJ×mol <sup>-1</sup> ×<br>HAC <sup>-1</sup> ] |
|----------------|-------------------------------------------------------------------------------------|-------------------|--------------------------------------------------------------------|
| 1 <sup>a</sup> | 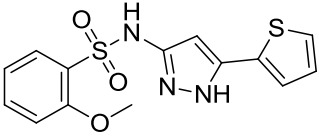   | -69.11            | 3.14                                                               |
| 2 <sup>a</sup> |   | -60.48            | 2.52                                                               |
| 3 <sup>a</sup> |  | -56.03            | 2.80                                                               |
| 4 <sup>a</sup> |  | -53.66            | 2.33                                                               |

| Compound       | Molecular structure                                                                 | Score<br>[kJ/mol] | Predicted<br>LE*<br>[kJ×mol <sup>-1</sup> ×<br>HAC <sup>-1</sup> ] |
|----------------|-------------------------------------------------------------------------------------|-------------------|--------------------------------------------------------------------|
| 5 <sup>a</sup> | 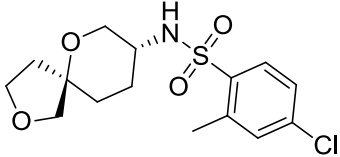   | -46.75            | 2.12                                                               |
| 6 <sup>a</sup> |    | -39.96            | 1.60                                                               |
| 7 <sup>a</sup> |  | -38.81            | 1.62                                                               |
| 8 <sup>a</sup> |  | -37.87            | 1.72                                                               |

| Compound              | Molecular structure                                                                 | Score<br>[kJ/mol] | Predicted<br>LE*<br>[kJ×mol <sup>-1</sup> ×<br>HAC <sup>-1</sup> ] |
|-----------------------|-------------------------------------------------------------------------------------|-------------------|--------------------------------------------------------------------|
| <b>9<sup>a</sup></b>  | 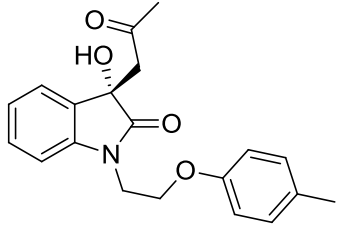   | -37.63            | 1.50                                                               |
| <b>10<sup>a</sup></b> |    | -37.27            | 1.62                                                               |
| <b>11<sup>b</sup></b> |  | -35.78            | 1.88                                                               |
| <b>12<sup>b</sup></b> |  | -35.76            | 1.70                                                               |

| Compound        | Molecular structure                                                                 | Score<br>[kJ/mol] | Predicted<br>LE*<br>[kJ×mol <sup>-1</sup> ×<br>HAC <sup>-1</sup> ] |
|-----------------|-------------------------------------------------------------------------------------|-------------------|--------------------------------------------------------------------|
| 13 <sup>a</sup> | 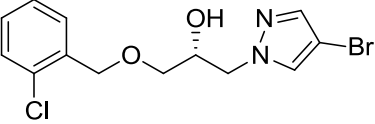   | -35.29            | 1.86                                                               |
| 14 <sup>a</sup> |    | -34.53            | 1.57                                                               |
| 15 <sup>a</sup> |  | -32.38            | 1.35                                                               |
| 16 <sup>b</sup> |  | -32.32            | 1.70                                                               |

| Compound        | Molecular structure                                                                 | Score<br>[kJ/mol] | Predicted<br>LE*<br>[kJ×mol <sup>-1</sup> ×<br>HAC <sup>-1</sup> ] |
|-----------------|-------------------------------------------------------------------------------------|-------------------|--------------------------------------------------------------------|
| 17 <sup>b</sup> | 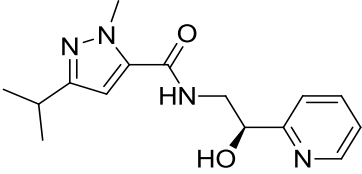   | -31.43            | 1.50                                                               |
| 18 <sup>a</sup> |    | -31.38            | 1.25                                                               |
| 19 <sup>a</sup> |  | -31.37            | 1.43                                                               |
| 20 <sup>a</sup> |  | -31.25            | 1.49                                                               |

| Compound        | Molecular structure                                                                 | Score<br>[kJ/mol] | Predicted<br>LE*<br>[kJ×mol <sup>-1</sup> ×<br>HAC <sup>-1</sup> ] |
|-----------------|-------------------------------------------------------------------------------------|-------------------|--------------------------------------------------------------------|
| 21 <sup>a</sup> | 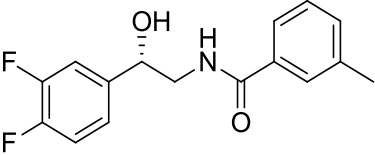   | -31.24            | 1.49                                                               |
| 22 <sup>a</sup> |    | -31.22            | 1.56                                                               |
| 23 <sup>b</sup> |  | -31.08            | 1.55                                                               |
| 24 <sup>b</sup> |  | -26.77            | 1.16                                                               |

| Compound        | Molecular structure                                                                 | Score [kJ/mol] | Predicted LE* [kJ×mol <sup>-1</sup> ×HAC <sup>-1</sup> ] |
|-----------------|-------------------------------------------------------------------------------------|----------------|----------------------------------------------------------|
| 25 <sup>a</sup> | 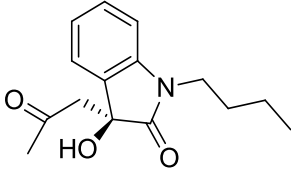   | -26.40         | 1.40                                                     |
| 26 <sup>a</sup> |    | -25.95         | 1.44                                                     |
| 27 <sup>b</sup> |  | -25.66         | 1.50                                                     |

\* Predicted ligand efficiency (see equation (1))

\*\* Inhibition (see equation (2)) at 300 μM (100 μM in case of compound **24**)

† Assay interference due to autofluorescence

<sup>a</sup> Compounds have been purchased from Enamine

<sup>b</sup> Compounds have been purchased from Chembridge
